# Supplementary material for: Solvation of apolar compounds in protic ionic liquids: the non-synergistic effect of electrostatic interactions and hydrogen bonds
Source: Royal Society of Chemistry journal article supplement (doi:10.1039/c7cp05249a), 2017-01-01
Supplement: c7cp05249a1.pdf [file c7cp05249a1.pdf]

### $^1\text{H}$ NMR spectra of synthesized protic ionic liquids

Propylammonium nitrate ( $\text{D}_2\text{O}$ , 400 MHz)

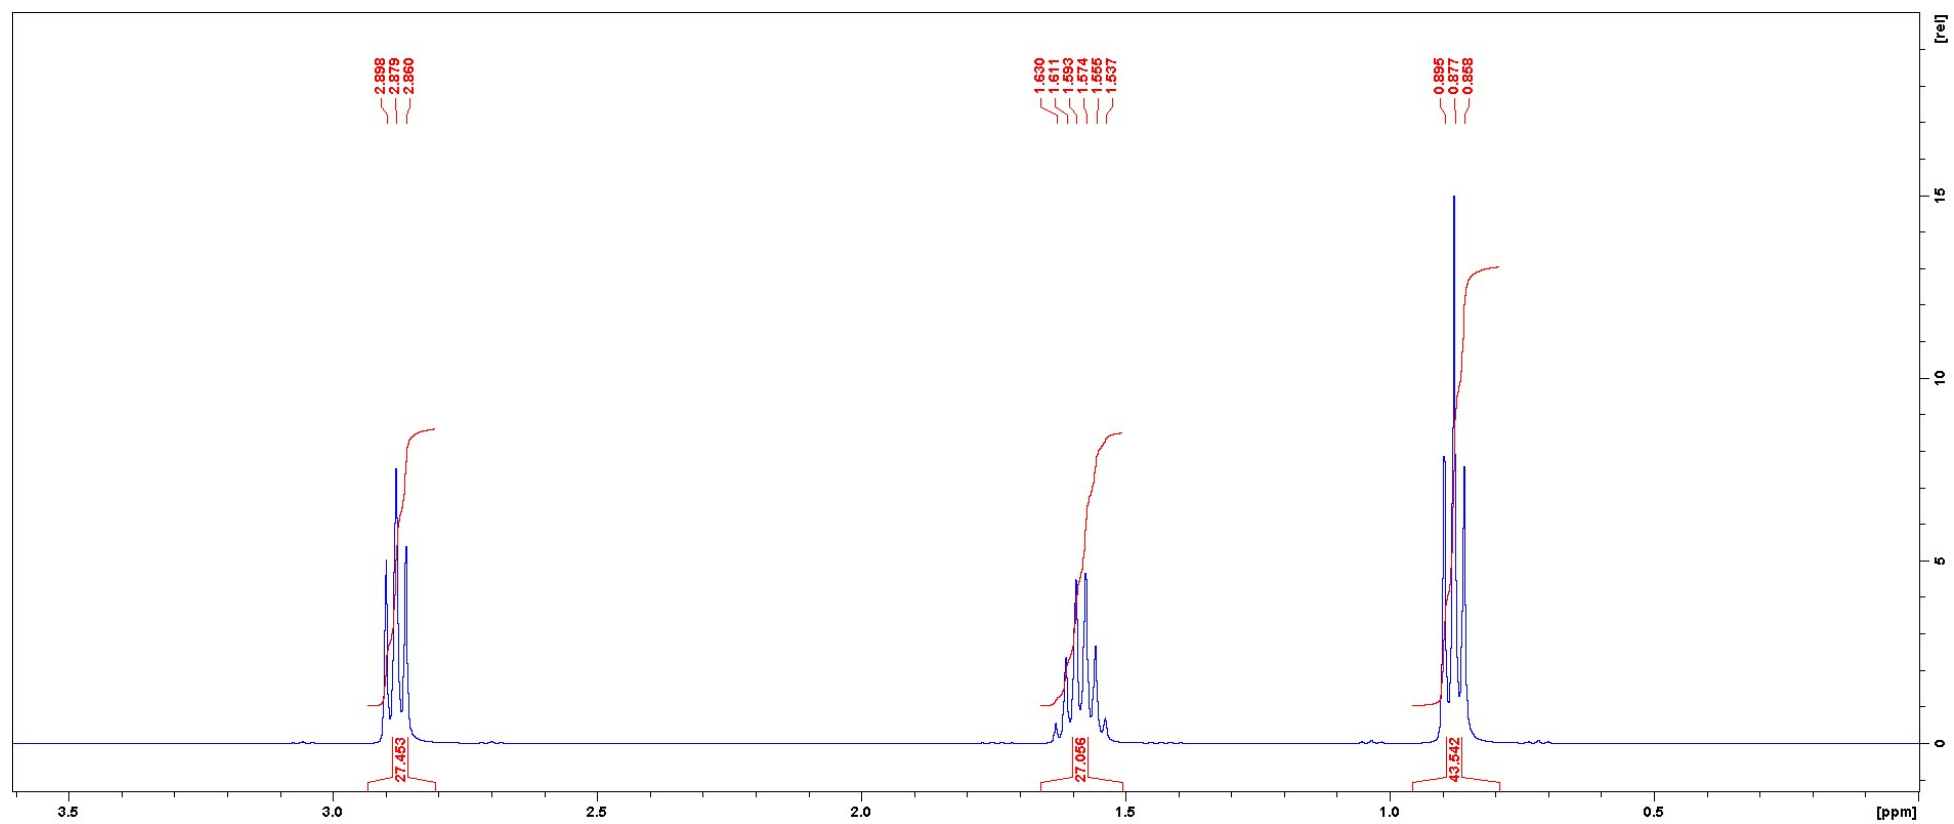

Purity: > 0.99 g/g

Butylammonium nitrate (D<sub>2</sub>O, 400 MHz)

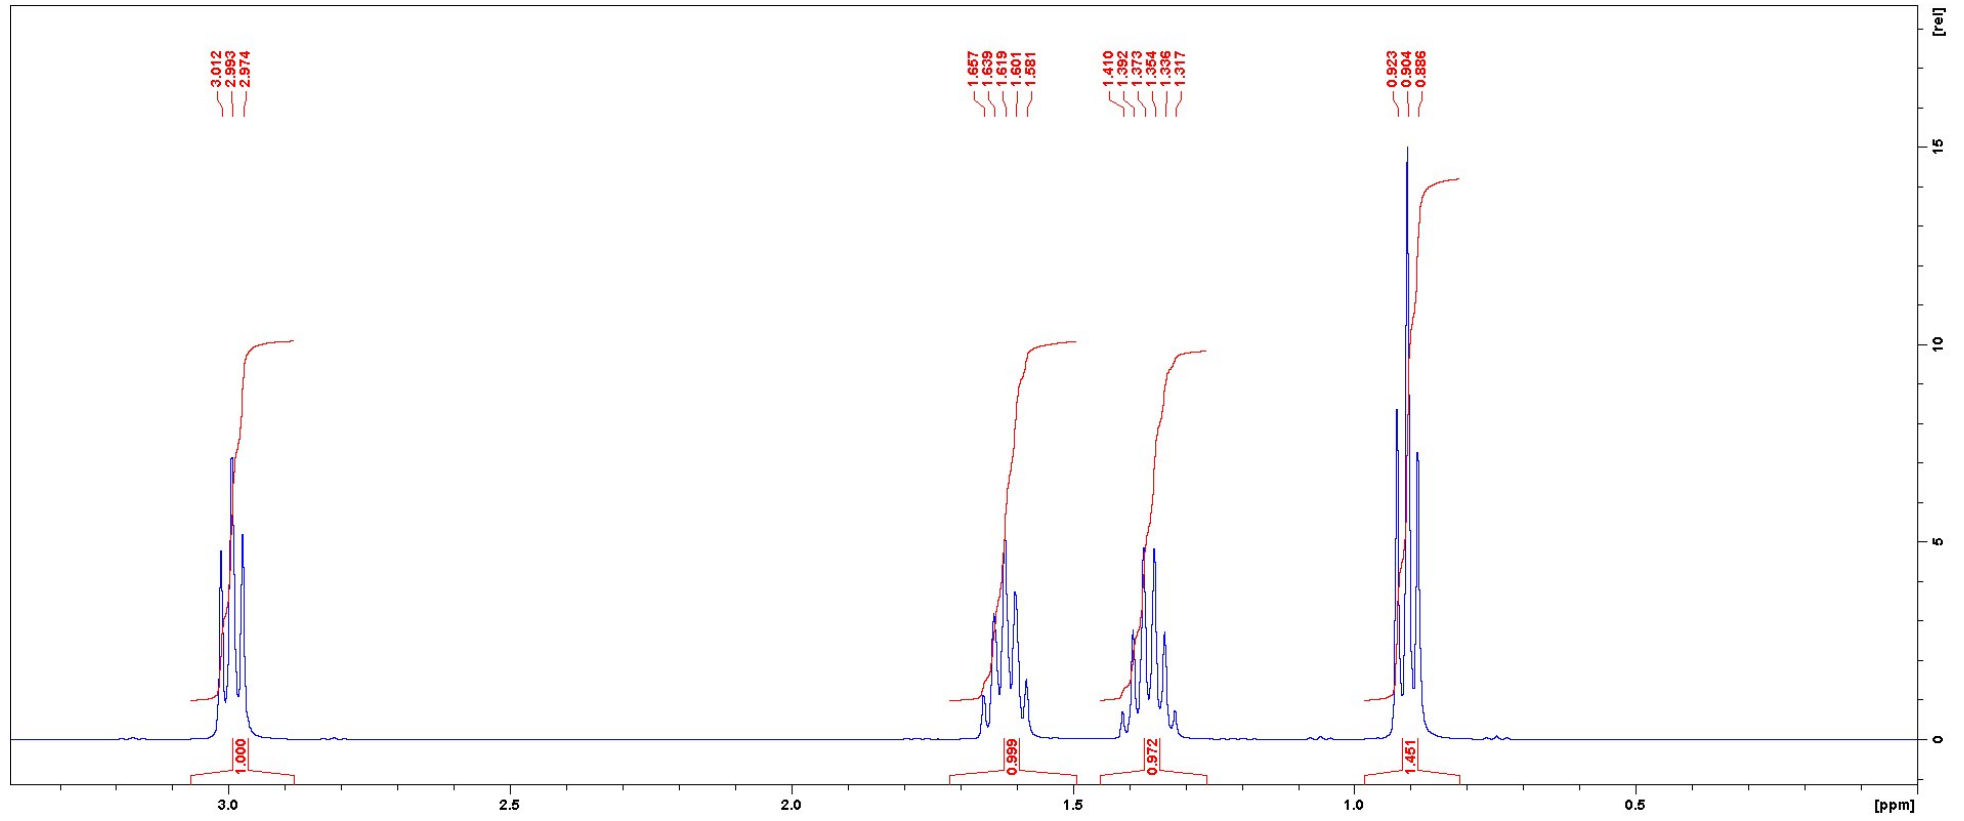

Purity: > 0.99 g/g
