# Supplementary material for: Solvation of apolar compounds in protic ionic liquids: the non-synergistic effect of electrostatic interactions and hydrogen bonds
Source: Royal Society of Chemistry journal article supplement (doi:10.1039/c7cp05249a), 2017-01-01
Supplement: c7cp05249a2.xlsx [file c7cp05249a2.xlsx]

## Sheet: Properties
				Physical properties of the synthesized ionic liquids and comparison with the literature data. All the values of densities and refractive indices are at T = 298.15 K.
Ionic liquid	Refractive index (our experiment)	Uncertainty (our experiment)	Temperature uncertainty (our experiment)	Refractive index (literature)	Uncertainty	Temperature uncertainty	Reference	Density/(g/ml) (our experiment)	Uncertainty (our experiment)	Temperature uncertainty (our experiment)	Density/(g/ml) (literature)	Temperature uncertainty	Reference	Tm/K (our experiment)	Tm/K (literature)	Reference
Propylammonium nitrate	1.4548	0.0004	0.1	1.45489	4e-05	0.03	[1]	1.157	0.002	0.1	1.15128	0.02	[1]	276	277	[3]
				1.4549	0.0005	0.1	[2]				1.15091	0.001	[2]		278	[6]
				1.455		0.1	[3]				1.1568	0.1	[3]		271	[9]
											1.15035	0.01	[4]
											1.1509	0.01	[5]
											1.1509	0.002	[6]
Butylammonium nitrate	1.4545	0.0002	0.1	1.45388	4e-05	0.03	[1]	1.112	0.004	0.1	1.10555	0.02	[1]	303	456	[6]
				1.4527	0.0005	0.1	[2]				1.10393	0.001	[2]		247	[7]
				1.4458	0.0001	0.01	[7]				1.10549	0.01	[4]
											1.10152	0.01	[7]
											1.105		[8]
References
1	L. Segade, M. Cabanas, M. Domínguez-Pérez, E. Rilo, S. García-Garabal, M. Turmine, L. M. Varela, V. Gómez-González, B. Docampo-Alvarez and O. Cabeza, Surface and bulk characterisation of mixtures containing alkylammonium nitrates and water or ethanol: Experimental and simulated properties at 298.15K, J. Mol. Liq., 2016, 222, 663–670.
2	S. B. Capelo, T. Méndez-Morales, J. Carrete, E. López Lago, J. Vila, O. Cabeza, J. R. Rodríguez, M. Turmine and L. M. Varela, Effect of Temperature and Cationic Chain Length on the Physical Properties of Ammonium Nitrate-Based Protic Ionic Liquids, J. Phys. Chem. B, 2012, 116, 11302–11312.
3	C. F. Poole, B. R. Kersten, S. S. J. Ho, M. E. Coddens and K. G. Furton, Organic salts, liquid at room temperature, as mobile phases in liquid chromatography, J. Chromatogr. A, 1986, 352, 407–425.
4	M. Usula, E. Matteoli, F. Leonelli, F. Mocci, F. C. Marincola, L. Gontrani and S. Porcedda, Thermo-physical properties of ammonium-based ionic liquid + N-methyl-2-pyrrolidone mixtures at 298.15 K, Fluid Phase Equilibria, 2014, 383, 49–54.
5	S. Porcedda, B. Marongiu, M. Schirru, D. Falconieri and A. Piras, Excess enthalpy and excess volume for binary systems of two ionic liquids + water, J. Therm. Anal. Calorim., 2011, 103, 29–33.
6	J. N. Canongia Lopes, J. M. S. S. Esperança, A. M. de Ferro, A. B. Pereiro, N. V. Plechkova, L. P. N. Rebelo, K. R. Seddon and I. Vázquez-Fernández, Protonic Ammonium Nitrate Ionic Liquids and Their Mixtures: Insights into Their Thermophysical Behavior, J. Phys. Chem. B, 2016, 120, 2397–2406.
7	Y. Xu, B. Chen, W. Qian and H. Li, Properties of pure n-butylammonium nitrate ionic liquid and its binary mixtures of with alcohols at T = (293.15 to 313.15) K, J. Chem. Thermodyn., 2013, 58, 449–459.
8	E. Bodo, S. Mangialardo, F. Capitani, L. Gontrani, F. Leonelli and P. Postorino, Interaction of a long alkyl chain protic ionic liquid and water, J. Chem. Phys., 2014, 140, 204503.
9	L. F. O. Faria, T. C. Penna and M. C. C. Ribeiro, Raman Spectroscopic Study of Temperature and Pressure Effects on the Ionic Liquid Propylammonium Nitrate, J. Phys. Chem. B, 2013, 117, 10905–10912.
